# Supplementary material
Source: MDPI journal article supplement (https://www.mdpi.com/2073-4395/11/5/951)
Supplement: s1 [file s1]

# Locusts and People: Integrating the Social Sciences in Sustainable Locust Management

Clara Therville <sup>1,\*</sup>, John M. Anderies <sup>1,2</sup>, Michel Lecoq <sup>3</sup> and Arianne Cease <sup>1,4</sup>

## Supplementary Materials

**Table S1.** Detailed categorization of the papers referenced in Figure 1 that are specifically focusing on locusts, and graphically illustrated in Figure 2 (n = 25). A single paper can pursue several objectives and use a variety of methods.

| Approaches                     | References                     | Total | Methods                    | References                         | Total |
|--------------------------------|--------------------------------|-------|----------------------------|------------------------------------|-------|
| Economy, development           | [4,25,47,51,62-63,65-68]       | 10    | Document analysis          | [4,8,9,10,31,48,50-52,55,61,68,90] | 13    |
| Environmental history          | [8,10,20,50,52]                | 5     | Economic evaluation        | [25,47,51,63,65]                   | 5     |
| Governance                     | [48,61]                        | 2     | Ethnographic approach      | [9,50,90]                          | 3     |
| Opinion                        | [19]                           | 1     | Expertise                  | [19,31,48,61,63]                   | 5     |
| Sociology                      | [9,90]                         | 2     | Interview                  | [9,50,56,67,90]                    | 5     |
| System                         | [31,55,56,59,60]               | 5     | Modelling                  | [51,59,60]                         | 3     |
| Objectives                     | References                     | Total | Quantitative data analysis | [4,51,62,63,65]                    | 5     |
| People preferences perceptions | [47,66,67]                     | 3     | Questionnaire              | [47,51,65,66]                      | 4     |
| Policy efficiency              | [4,19,25,47,51,62,63,65,66]    | 9     | Participative workshop     | [66,67]                            | 2     |
| Policy function structure      | [8-10,19,20,48,50,52,61,68,90] | 11    | Ecological surveys         | [56]                               | 1     |
| Social-ecological analysis     | [31,55,56,59,60]               | 5     |                            |                                    |       |
